# Supplementary material for: Impact of Deep Eutectic Solvents on Kinetics and Folding Stability of Formate Dehydrogenase
Source: MDPI journal article supplement (doi:10.3390/pr11102815), 2023-09-22
Supplement: s1 [file s1]

## Supplementary Materials: Impact of Deep Eutectic Solvents Impact on Kinetics and Folding Stability of Formate Dehydrogenase

Nicolás F. Gajardo-Parra <sup>1</sup>, Gabriel Rodríguez <sup>1</sup>, Andrés F. Arroyo-Avirama <sup>2</sup>, Astrit Veliju <sup>3</sup>, Thomas Happe <sup>3</sup>, Roberto I. Canales <sup>2</sup>, Gabriele Sadowski <sup>1</sup> and Christoph Held <sup>1,\*</sup>

### 1. Supplementary Figures:

1

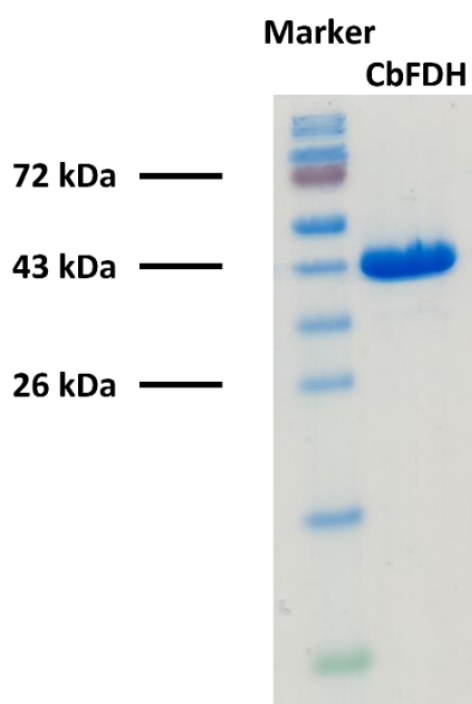

**Figure S1.** SDS-PAGE of purified *cbFDH*

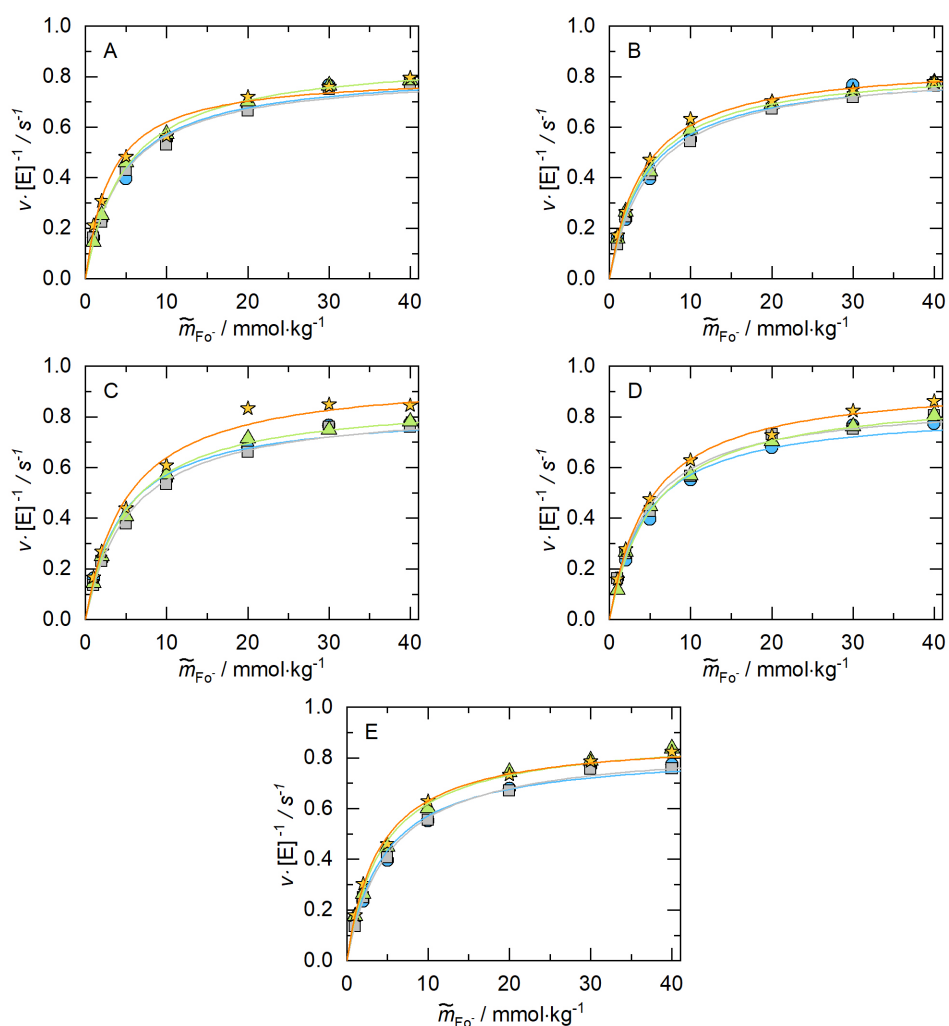

**Figure S2.** Michaelis-Menten curves for the *cbFDH* reaction ( $T = 25\text{ }^{\circ}\text{C}$ ,  $p = 1\text{ bar}$ ) with various co-solvents (A: BET, B: GLY, C: SOR, D: DES1, E: DES2) at different concentrations (grey: 5 wt.-%, green: 10 wt.-%, orange: 15 wt.-%, blue: neat buffer). Here the reaction rate  $v$  normalized to the enzyme total molality is plotted against the formate molality.

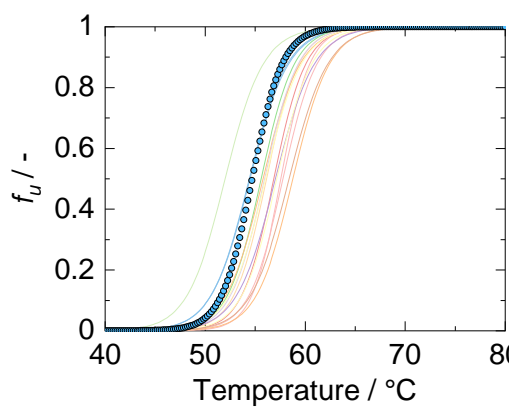

**Figure S3.** Sigmoidal curves of the fraction of unfolding *cbFDH* molecules as a function of the temperature obtained from fluorescence measurements via nanoDSF. Each system is represented by a different color, with the blue curve with circles describing the neat buffer.

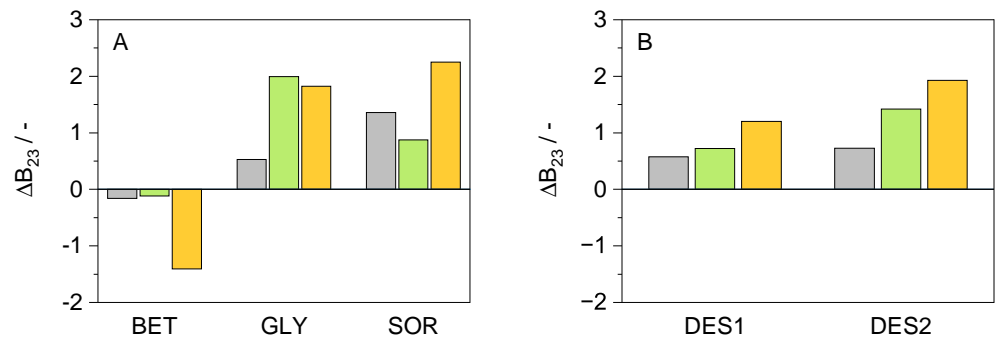

**Figure S4.** Graphical representation of the results obtained for the  $\Delta B_{2,3}$  of *cbFDH* in the presence of various co-solvents (A: BET, GLY, SOR / B: DES1, DES2) at different concentrations (grey: 5 wt.-%, green: 10 wt.-%, orange: 15 wt.-%, value 0: neat buffer).

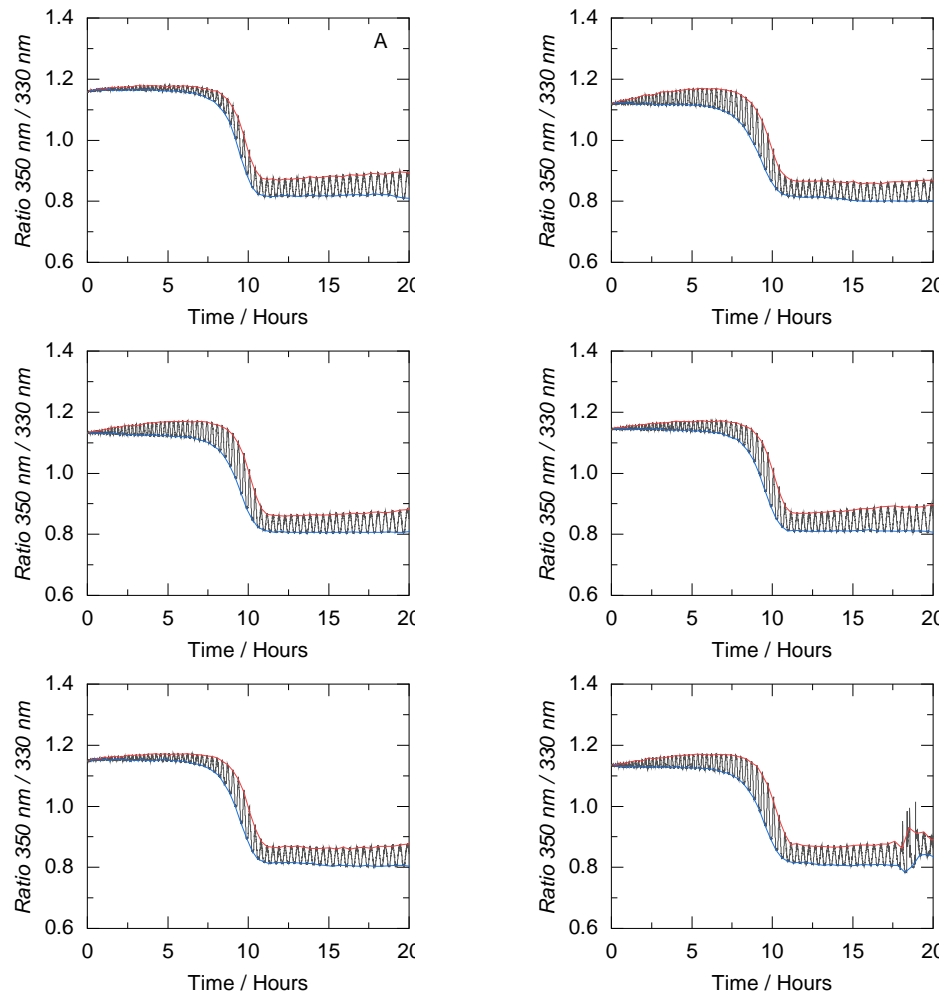

**Figure S5.** Unfolding (blue) and non-reversibility (red) curves of *cbFDH* obtained from the MSF measurements under the influence of various co-solvents at 5 wt.-% concentration (A: buffer, B: BET, C: GLY, D: SOR, E: DES1, F: DES2). Here the fluorescence ratio at 350 nm and 330 nm is plotted against the time. Its scale (x-axis) correlates to the temperature during the measurement (between 20-80 °C).

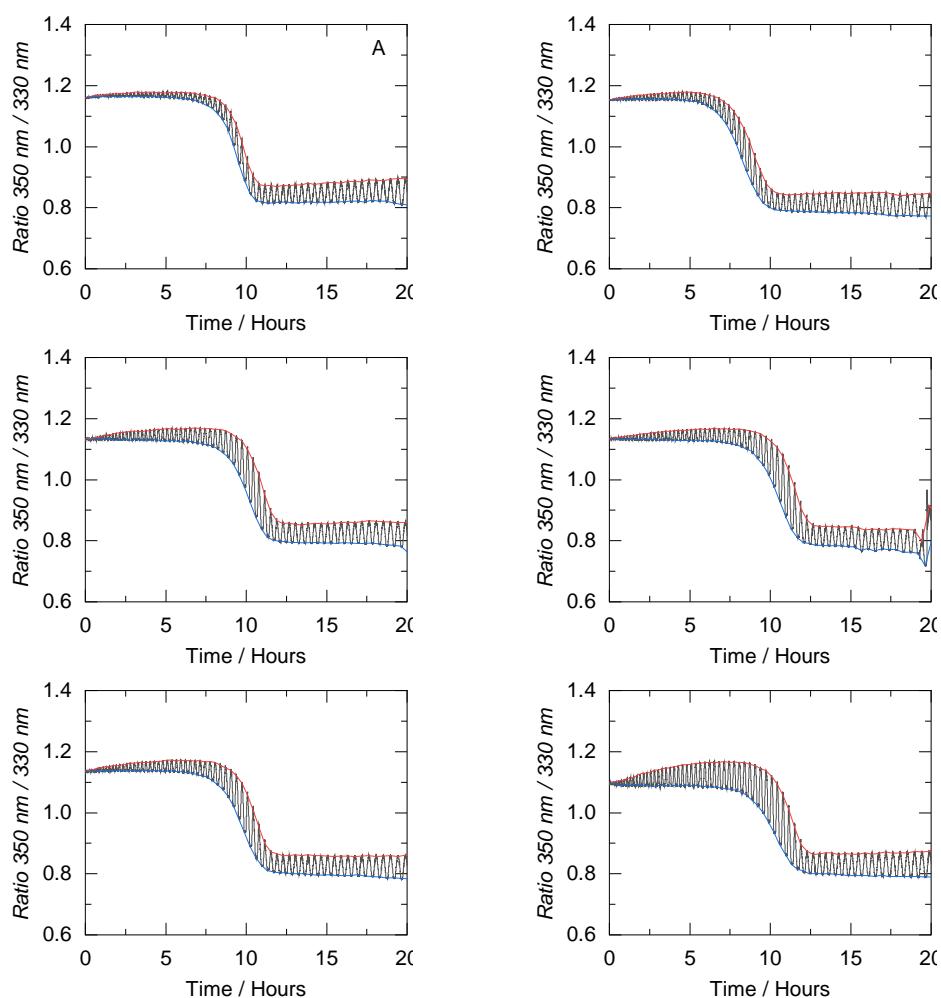

**Figure S6.** Unfolding (blue) and non-reversibility (red) curves of *cbFDH* obtained from the MSF measurements under the influence of various co-solvents at 15 wt.-% concentration (A: buffer, B: BET, C: GLY, D: SOR, E: DES1, F: DES2). Here the fluorescence ratio at 350 nm and 330 nm is plotted against the time. Its scale (x-axis) correlates to the temperature during the measurement (between 20-80 °C).

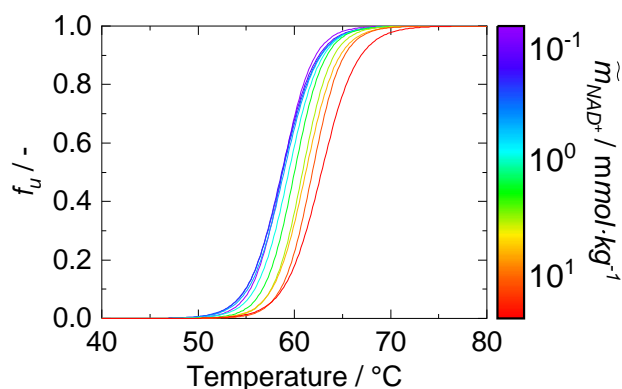

**Figure S7.** Qualitative illustration of the sigmoidal curves of the fraction of unfolding *cbFDH* molecules with bound  $\text{NAD}^+$  as a function of the temperature, obtained from fluorescence measurements via nanoDSF. Each  $\text{NAD}^+$  molality is shown in a color scale, with blue representing the lowest and red the highest.

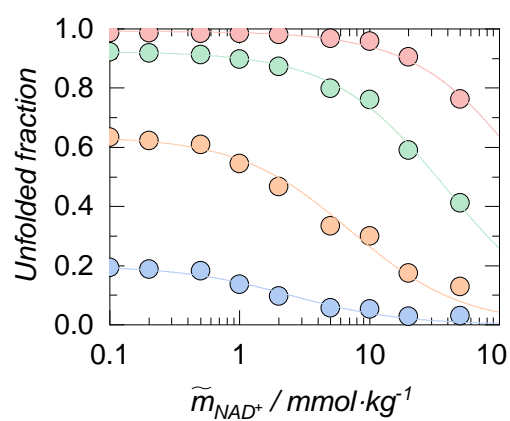

**Figure S8.** Qualitative illustration of the unfolding curves obtained from the isothermal approach using FoldAffinity as a function of the NAD<sup>+</sup> molality. Every curve was measured for a specific system at a different temperature in a range  $T_u \pm 10$ , with the red curve representing the highest temperature and the blue curve the lowest.

## 2. Supplementary Tables:

2

**Table S1.** List of the chemicals utilized in this work, including the compound name, the Chemical Abstracts Service (CAS) Number, the purity, and the supplier.

| Compound              | CAS-Number                              | Purity / wt.-% | Supplier      |
|-----------------------|-----------------------------------------|----------------|---------------|
| Formate dehydrogenase | obtained from recombinant <i>E.coli</i> |                |               |
| Sodium formate        | 141-53-7                                | >99.0          | VWR Chemicals |
| NAD <sup>+</sup>      | 53-84-9                                 | >96.5          | Sigma-Aldrich |
| Betaine               | 107-43-7                                | >99.0          | Sigma-Aldrich |
| Glycerol              | 56-81-5                                 | >99.5          | VWR Chemicals |
| D-Sorbitol            | 50-70-4                                 | >99.0          | Sigma-Aldrich |
| Trizma Base           | 77-86-1                                 | >99.9          | Sigma-Aldrich |
| Trizma Hydrochloride  | 1185-53-1                               | >99.0          | Sigma-Aldrich |

**Table S2.** Kinetic parameters ( $K_M$ ,  $k_{cat}$  and  $K_{eff}$ ) of the *cbFDH* reaction (T = 25 °C, p = 1 bar) under the influence of different co-solvents obtained from Equation 2.

| System        | $K_{M,formate}$<br>mmol·kg <sup>-1</sup> | $k_{cat}$<br>s <sup>-1</sup> | $K_{eff}$<br>kg·mmol <sup>-1</sup> ·s <sup>-1</sup> |
|---------------|------------------------------------------|------------------------------|-----------------------------------------------------|
| Buffer        | 5.488                                    | 0.884                        | 0.161                                               |
| 5 wt.-% BET   | 5.505                                    | 0.874                        | 0.159                                               |
| 10 wt.-% BET  | 5.02                                     | 0.884                        | 0.176                                               |
| 15 wt.-% BET  | 3.933                                    | 0.863                        | 0.22                                                |
| 5 wt.-% GLY   | 5.395                                    | 0.858                        | 0.159                                               |
| 10 wt.-% GLY  | 4.71                                     | 0.862                        | 0.183                                               |
| 15 wt.-% GLY  | 4.09                                     | 0.855                        | 0.209                                               |
| 5 wt.-% SOR   | 6.083                                    | 0.883                        | 0.145                                               |
| 10 wt.-% SOR  | 5.316                                    | 0.885                        | 0.167                                               |
| 15 wt.-% SOR  | 5.287                                    | 0.98                         | 0.185                                               |
| 5 wt.-% DES1  | 5.153                                    | 0.899                        | 0.175                                               |
| 10 wt.-% DES1 | 5.808                                    | 0.917                        | 0.158                                               |
| 15 wt.-% DES1 | 5.296                                    | 0.965                        | 0.182                                               |
| 5 wt.-% DES2  | 5.402                                    | 0.868                        | 0.161                                               |
| 10 wt.-% DES2 | 5.063                                    | 0.933                        | 0.184                                               |
| 15 wt.-% DES2 | 4.392                                    | 0.907                        | 0.207                                               |

**Table S3.** Thermal parameters ( $T_u$ ,  $\Delta\Delta G'_u$ ,  $B_{23}$ ,  $pk'^o_u$ , and  $T_{eclu}$ ) for *cbFDH* under the influence of various co-solvents at different concentrations. The results were obtained after data analysis via MoltenProt.

| System        | $T_u$<br>°C | $\Delta\Delta G'_u$<br>kJ·mol <sup>-1</sup> | $\Delta B_{23}$<br>- | $pk'^o_u$<br>- | $T_{eocl}$<br>°C | $T_{nr}$<br>°C | $K_D$<br>mM |
|---------------|-------------|---------------------------------------------|----------------------|----------------|------------------|----------------|-------------|
| Buffer        | 54.71       | 0                                           | 0                    | 8.381          | 72.69            | 58.9           | 1.55        |
| 5 wt.-% BET   | 54.41       | -0.102                                      | -0.157               | 7.034          | 71.15            | 58.8           | 0.807       |
| 10 wt.-% BET  | 54.48       | -0.077                                      | -0.119               | 6.918          | 71.17            | 58.8           | 0.978       |
| 15 wt.-% BET  | 52.00       | -0.916                                      | -1.407               | 6.472          | 67.77            | 56.2           | 1.69        |
| 5 wt.-% GLY   | 55.59       | 0.343                                       | 0.526                | 8.584          | 73.48            | 59.7           | 1.14        |
| 10 wt.-% GLY  | 57.57       | 1.298                                       | 1.994                | 8.772          | 76.94            | 61             | 1.103       |
| 15 wt.-% GLY  | 57.78       | 1.188                                       | 1.825                | 9.177          | 76.51            | 62.1           | 0.272       |
| 5 wt.-% SOR   | 56.87       | 0.883                                       | 1.356                | 8.885          | 75.5             | 59.8           | 0.537       |
| 10 wt.-% SOR  | 56.12       | 0.568                                       | 0.873                | 8.66           | 74.37            | 61.4           | 0.774       |
| 15 wt.-% SOR  | 58.77       | 1.465                                       | 2.25                 | 8.906          | 77.54            | 63.3           | 1.02        |
| 5 wt.-% DES1  | 55.78       | 0.376                                       | 0.577                | 7.881          | 73.23            | 59.4           | 0.67        |
| 10 wt.-% DES1 | 55.93       | 0.471                                       | 0.723                | 7.818          | 73.91            | 60             | 0.794       |
| 15 wt.-% DES1 | 57.03       | 0.783                                       | 1.202                | 7.886          | 74.75            | 60.7           | 0.577       |
| 5 wt.-% DES2  | 56.02       | 0.473                                       | 0.726                | 8.02           | 73.71            | 60             | 0.22        |
| 10 wt.-% DES2 | 57.17       | 0.924                                       | 1.42                 | 8.079          | 75.51            | 61.1           | 0.19        |
| 15 wt.-% DES2 | 58.40       | 1.257                                       | 1.93                 | 7.695          | 76.7             | 62.8           | 0.176       |
